# Supplementary material
Source: PubMed Central journal article supplement (PMC4384419)
Supplement: NIHMS675233-supplement-Supplementary_figures_and_data.pdf [file NIHMS675233-supplement-Supplementary_figures_and_data.pdf]

# Supplementary figure 1

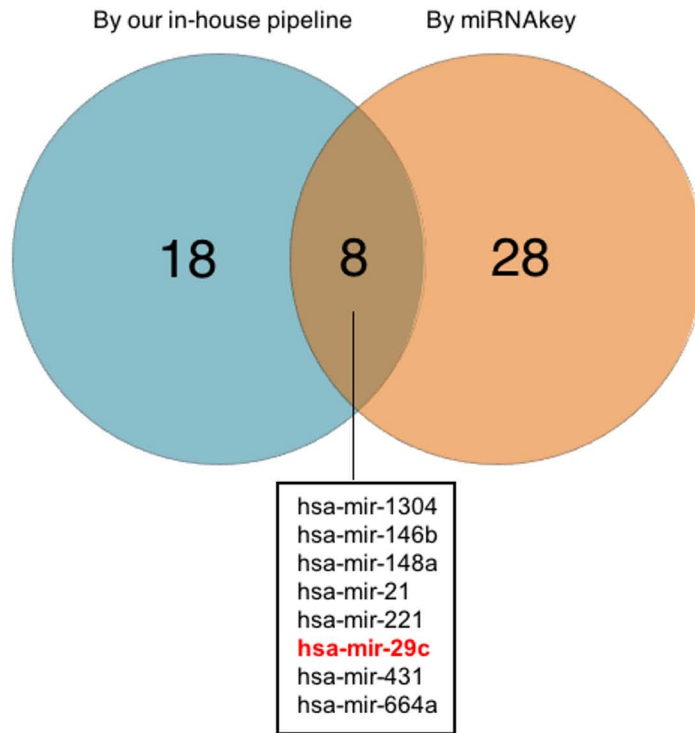

## NGS data analysis using a miRNAkey and comparison with the data from our in-house pipeline.

We performed one-way ANOVA tests using the read counts table generated by miRNAkey and obtained 36 miRNAs with 100 fold and raw P-value  $< 0.03$ . In the results by our in-house pipeline, we obtained 26 miRNAs with 10 fold and raw P-value  $< 0.05$ . The miR-29c was detectable in both NGS analysis tools.

## Supplementary figure 2

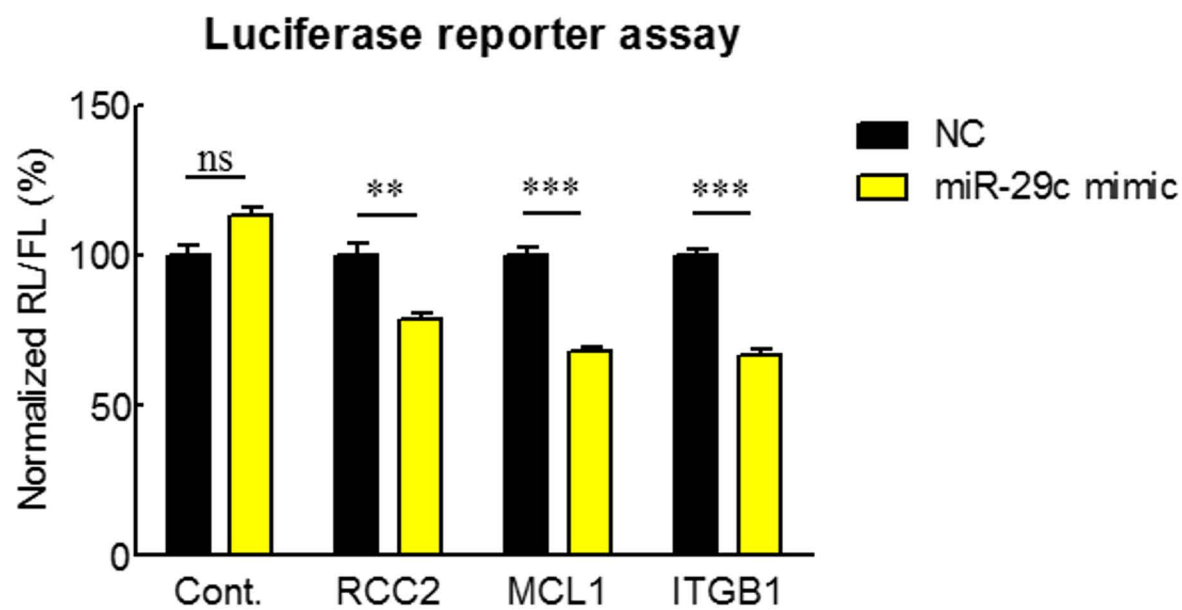

\*\* $p < 0.01$ , \*\*\* $p < 0.001$ , t test.

# Supplementary figure 3

**ITGB1** expression  
in 24 pairs of GC and NM tissues

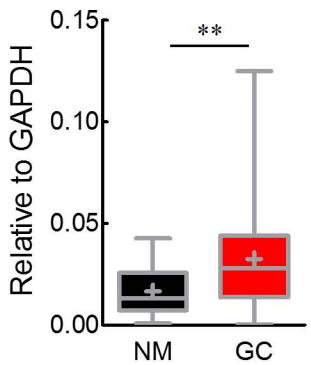

**RCC2** expression  
in 24 pairs of GC and NM tissues

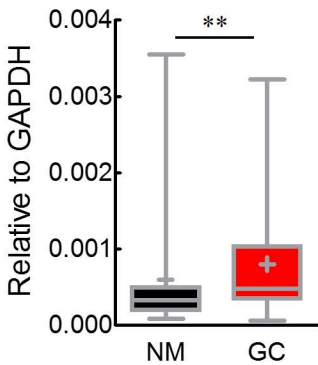

**MCL1** expression  
in 24 pairs of GC and NM tissues

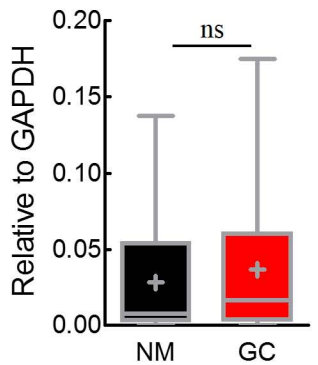

\*\*p<0.01, t test.

Correlation between  
**ITGB1** and **miR-29c** expression

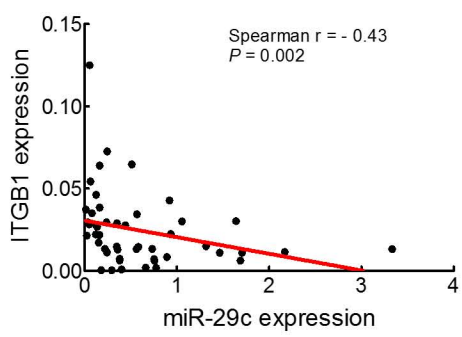

Correlation between  
**RCC2** and **miR-29c** expression

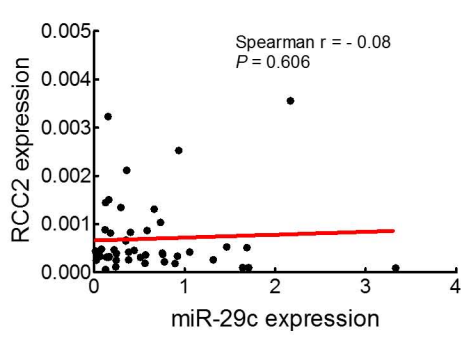

Correlation between  
**MCL1** and **miR-29c** expression

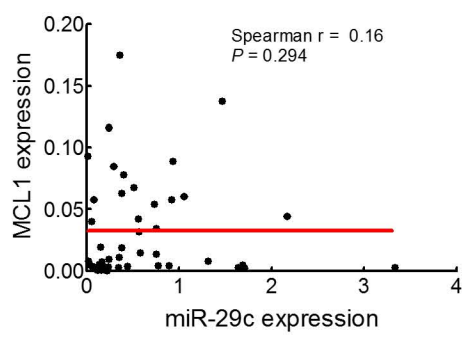

## Supplementary Materials and Methods

### *Transgenic mice models*

The K19 promoter with a synthetic intron and SV40 poly(A) cassette were cloned into pBluescript vector (Stratagene, La Jolla, CA, USA) to construct pK19 as described previously.<sup>1</sup> For *K19-C2mE* mice, Full-length cDNAs for COX-2 and mPGES-1 were amplified by RT-PCR. After sequence confirmation, the cDNA fragments were subcloned into pK19 to construct pK19-COX-2 and pK19-mPGES, respectively. Two expression vectors were co-microinjected into fertilized eggs of the F<sub>1</sub> (C3H and C57BL/6) hybrid females crossed with C57BL/6 male as described previously.<sup>1</sup>

For *Gan (K19-Wnt1/C2mE)* mice, *Wnt1* cDNA was excised from pUSEamp-Wnt1 (Upstate, Charlottesville, VA). These fragments were cloned into pBluescript (Stratagene, La Jolla, CA) to construct the pK19-Wnt1 transgenic vector as described previously.<sup>2</sup> The expression vector was microinjected into the fertilized eggs of F1 (C3H and C57BL/6) hybrid females crossed with C57BL/6 males to generate *K19-Wnt1* transgenic mice. To minimize any genetic background differences, littermate mice for the experiments from the mating of N2-backcrossed *K19-Wnt1* with N6-backcrossed *K19-C2mE* mice were used as described previously.<sup>2</sup> Backcrossing was performed using wild-type C57BL/6 mice.

**Supplementary Table 1. Characteristics of All Patients from each GC Cohort**

| Characteristic        | NGS discovery cohort | NGS validation cohort | Clinical validation cohort |
|-----------------------|----------------------|-----------------------|----------------------------|
|                       | Patients <i>n</i> =4 | Patients <i>n</i> =24 | Patients <i>n</i> =113     |
| Age (years)           |                      |                       |                            |
| Mean (SD)             | 65.5 (12.9)          | 60.8 (11.5)           | 65.5 (13.2)                |
| Median (Min-Max)      | 67 (50-78)           | 61 (34-76)            | 68 (18-90)                 |
| Gender                |                      |                       |                            |
| Male                  | 1                    | 16                    | 71                         |
| Female                | 3                    | 8                     | 42                         |
| WHO Classification    |                      |                       |                            |
| WD                    | 1                    | 2                     | 19                         |
| MD                    | 0                    | 10                    | 27                         |
| PD                    | 2                    | 11                    | 51                         |
| Mucinous              | 1                    | 1                     | 5                          |
| SRC                   | 0                    | 0                     | 11                         |
| Lauren Classification |                      |                       |                            |
| Intestinal            | 1                    | 9                     | 46                         |
| Diffuse               | 3                    | 10                    | 64                         |
| Mixed                 | 0                    | 5                     | 3                          |
| TNM stage             |                      |                       |                            |
| I                     | 0                    | 5                     | 38                         |
| II                    | 2                    | 3                     | 19                         |
| III                   | 1                    | 11                    | 30                         |
| IV                    | 1                    | 5                     | 26                         |

WD, well differentiated adenocarcinoma; MD, moderately differentiated adenocarcinoma; PD, poorly differentiated adenocarcinoma; MUC, mucinous; SRC, signet ring cell

**Supplementary Table 2. Primers used in gene expression analyses, stable miR-29c expressing vectors, and luciferase assays**

| <b>Gene symbol</b>                        |         | <b>Sequence</b>                                |
|-------------------------------------------|---------|------------------------------------------------|
| Human <i>ITGB1</i>                        | Forward | 5'-ATCCCAGAGGCTCCAAAGAT-3'                     |
|                                           | Reverse | 5'-CCCCTGATCTTAATCGCAAA-3'                     |
| Human <i>RCC2</i>                         | Forward | 5'-AAGGAGCGCGTCAAACCTTGAA-3'                   |
|                                           | Reverse | 5'-GCTTGCTGTTTAGGCACTTCTT-3'                   |
| Human <i>MCL1</i>                         | Forward | 5'-CGGTAATCGGACTCAACCTC-3'                     |
|                                           | Reverse | 5'-CCTCCTTCTCCGTAGCCAA-3'                      |
| Mouse <i>itgb1</i>                        | Forward | 5'-TGTGACCCATTGCAAGGAGAAGGA-3'                 |
|                                           | Reverse | 5'-AATTGGGATGATGTCTGGGACCAGT-3'                |
| hsa-miR-29c cloning                       | Forward | 5'-AAAgagctcACAATGTATTGGGTGTCGATTG-3' (SacI)   |
|                                           | Reverse | 5'-AAgtaccATCCATTAACTATCTCTTACCTCTGC-3' (KpnI) |
| <i>ITGB1</i> 3'UTR reporter construct     | Forward | 5'-AATCTAGATATTTGCTGAATGGGG-3'                 |
|                                           | Reverse | 5'-AAGATATCAAGATGGGCAACTCA-3'                  |
| <i>ITGB1</i> Mut 3'UTR reporter construct | Forward | 5'-TCACCTCTTCTAATCTTTTA-3'                     |
|                                           | Reverse | 5'-CAGAAATTATTAGACATTAACAA-3'                  |
| <i>RCC2</i> 3'UTR reporter construct      | Forward | 5'-AAAgagctcTGAGTTATGAGGTGCCTTTCC-3' (SacI)    |
|                                           | Reverse | 5'-AAAActcgagACTTCCCATCCACCCA-3' (XhoI)        |
| <i>MCL1</i> 3'UTR reporter construct      | Forward | 5'-AAAgagctcTGGAATCATTAGCTGTGTGC-3' (SacI)     |
|                                           | Reverse | 5'-AAAActcgagAAATCCAAAGATGCCAATG-3' (XhoI)     |

Mut, mutated

**Supplementary Table 3. Summary of read/sequence counts for miRNA analysis from Illumina HiSeq sequencing the *NGS Profile*.**

| <b>Description</b>                     | <b>Total count</b> | <b>Gastric cancer (GC)</b> | <b>Normal gastric mucosa (NM)</b> |
|----------------------------------------|--------------------|----------------------------|-----------------------------------|
| Raw Illumina HiSeq reads               | 22,051,844         | 9,580,826                  | 12,471,018                        |
| Size selection $\geq 12$ and $\leq 27$ | -1,769             | -854                       | -915                              |
| Unmapped reads                         | -12,354,267        | -6,001,243                 | -6,353,024                        |
| Allow $\leq 1$ internal mismatch       | -51,486            | -17,933                    | -33,553                           |
| Undefined mapped reads                 | -12,142            | -4,958                     | -7,184                            |
| Total miRNA abundance                  | 9,625,084          | 3,555,838                  | 6,076,342                         |

**Supplementary Table 4. Sequencing counts for 26 miRNAs distinctly different between GCs and NMs from the *NGS Profile*.**

|                | Gastric cancer |            |            |            | Normal mucosa |            |            |             |            |            |
|----------------|----------------|------------|------------|------------|---------------|------------|------------|-------------|------------|------------|
|                | GC1            | GC2        | GC3        | GC4        | NM1           | NM2        | NM3        | NM4         | NM5        | NM6        |
| hsa-mir-1286   | 6.3431         | 1.6059     | 1.2831     | 3.9922     | 0.1727        | 0.1888     | 0.0928     | 1.1592      | 0.9758     | 1.6617     |
| hsa-mir-129-2  | 0              | 0.5353     | 1.4664     | 1.8426     | 7.9445        | 9.8156     | 7.5193     | 10.819      | 0.0976     | 6.093      |
| hsa-mir-1304   | 61.3169        | 50.5851    | 25.6613    | 21.4967    | 10.0169       | 15.4785    | 10.4898    | 8.1143      | 37.9602    | 12.74      |
| hsa-mir-135a-1 | 0              | 7.7617     | 1.2831     | 3.378      | 7.599         | 11.7033    | 9.283      | 28.9795     | 2.5372     | 19.9408    |
| hsa-mir-135b   | 62.7265        | 53.7968    | 62.8702    | 56.8126    | 5.1812        | 13.7797    | 7.9834     | 4.6367      | 121.8825   | 6.6469     |
| hsa-mir-146b   | 877.4662       | 1025.6188  | 2226.4851  | 1081.5897  | 722.0823      | 585.7297   | 881.4238   | 174.6501    | 504.5097   | 280.2794   |
| hsa-mir-148a   | 13853.3945     | 33873.2578 | 7621.043   | 37923.8164 | 35232.1211    | 45085.7148 | 38935.0781 | 122218.7344 | 29455.5566 | 94633.6406 |
| hsa-mir-196a-1 | 395.3884       | 314.7515   | 668.6605   | 149.5554   | 10.535        | 74.9387    | 15.7812    | 3.4775      | 889.3813   | 4.9852     |
| hsa-mir-204    | 1.4096         | 50.0498    | 8.6149     | 63.2616    | 492.9019      | 351.4756   | 558.8385   | 1560.2589   | 355.2061   | 3295.2224  |
| hsa-mir-2114   | 0.7048         | 0.2676     | 0.7332     | 0          | 5.0085        | 1.8876     | 2.3208     | 2.3184      | 0.4879     | 3.3235     |
| hsa-mir-2116   | 12.6863        | 5.3529     | 6.4153     | 8.2916     | 4.3176        | 2.2651     | 3.5276     | 0.7728      | 3.2203     | 1.1078     |
| hsa-mir-21     | 74148.3672     | 77557.6094 | 66978.0313 | 69479.7031 | 29565.6504    | 57241.0664 | 32994.8633 | 31861.2734  | 45368.7891 | 28403.498  |
| hsa-mir-218-1  | 2.8192         | 14.1852    | 28.4107    | 11.9767    | 46.1124       | 23.2178    | 51.428     | 31.6843     | 16.0038    | 49.2982    |
| hsa-mir-221    | 1652.0328      | 1642.0071  | 2166.9143  | 1870.2106  | 1610.6527     | 1809.8539  | 1531.1432  | 660.3473    | 840.7844   | 925.5869   |
| hsa-mir-222    | 3193.4133      | 2183.4546  | 2564.6646  | 2284.7891  | 1255.3973     | 1483.1063  | 1467.3688  | 626.731     | 2225.5024  | 1008.1198  |
| hsa-mir-223    | 333.3667       | 577.8473   | 416.6297   | 802.7472   | 127.4568      | 184.0434   | 207.2901   | 81.1427     | 274.9919   | 182.791    |
| hsa-mir-29c    | 260.7731       | 1000.7277  | 564.3655   | 1282.7372  | 1357.4663     | 1329.8312  | 1659.9917  | 3078.0144   | 405.0715   | 2340.2783  |
| hsa-mir-3195   | 5.6383         | 5.0853     | 5.4989     | 15.0477    | 17.2706       | 23.4065    | 73.9858    | 43.6625     | 2.0493     | 21.6026    |
| hsa-mir-33b    | 66.2505        | 53.7968    | 31.71      | 76.4667    | 23.8334       | 50.9659    | 21.0725    | 38.253      | 12.8811    | 27.6956    |
| hsa-mir-431    | 29.6013        | 14.4529    | 19.0627    | 23.6463    | 10.1896       | 14.9122    | 11.6038    | 2.3184      | 17.7603    | 4.9852     |
| hsa-mir-485    | 4.9335         | 8.297      | 8.9815     | 14.1264    | 17.4433       | 14.1572    | 20.237     | 11.9782     | 9.4657     | 7.7548     |
| hsa-mir-549a   | 8.4575         | 8.8323     | 15.0302    | 1.2284     | 0.1727        | 0.755      | 0.4642     | 0           | 5.7575     | 0.5539     |
| hsa-mir-551a   | 3.524          | 2.6765     | 0.1833     | 1.2284     | 0             | 0          | 0          | 0           | 0.0976     | 0          |
| hsa-mir-664a   | 6.3431         | 22.2146    | 24.0117    | 22.418     | 31.6051       | 45.6805    | 50.2212    | 46.3673     | 19.5168    | 83.0868    |
| hsa-mir-874    | 9.1623         | 33.7234    | 23.4618    | 25.796     | 51.2936       | 56.44      | 58.7616    | 66.0734     | 15.1255    | 58.1608    |
| hsa-mir-888    | 0              | 0          | 0          | 0          | 0.6908        | 2.6427     | 0.8355     | 3.0912      | 0          | 1.1078     |



**Supplementary Table 5. Summary of read/sequence counts for miRNA analysis from AB SOLiD sequencing of *Profile#1***

| Description                            | Total count  | GC stage I  | GC stage II | GC stage III | GC stage IV | NM          |
|----------------------------------------|--------------|-------------|-------------|--------------|-------------|-------------|
| Raw AB SOLiD reads                     | 183,332,039  | 35,941,161  | 29,014,565  | 57,596,038   | 33,334,536  | 27,445,739  |
| Size selection $\geq 12$ and $\leq 27$ | -135,426     | -102,059    | -5,301      | -12,887      | -8,320      | -6,859      |
| Unmapped reads                         | -144,179,145 | -27,329,247 | -23,927,086 | -45,769,608  | -26,456,209 | -20,696,995 |
| Allow $\leq 1$ internal mismatch       | -4,779,951   | -1,144,552  | -580,301    | -1,324,163   | -816,462    | -914,473    |
| Undefined mapped reads                 | -390,848     | -351,432    | -7,990      | -14,387      | -9,236      | -7,803      |
| Total miRNA abundance                  | 33,846,669   | 7,013,871   | 4,493,887   | 10,474,993   | 6,044,309   | 5,819,609   |

GC, gastric cancer; NM, normal mucosa

**Supplementary Table 6. List of miRNA significantly different between GC and NM for each profile**

| Profile name    | <i>NGS profile</i>                                                                                                                                                                                              | <i>Profile#1</i>                                                                                                                                                                                                                                                                                                                                                                                                                                                                                                                                                                                                                                                                                                   | <i>Profile#2</i>                                                                                                                                                                                                                                                                                                                                                                                                                                                                                                                                                                                                                                                                                                                                                                                                                                                                                                                                                                                                                                                             |
|-----------------|-----------------------------------------------------------------------------------------------------------------------------------------------------------------------------------------------------------------|--------------------------------------------------------------------------------------------------------------------------------------------------------------------------------------------------------------------------------------------------------------------------------------------------------------------------------------------------------------------------------------------------------------------------------------------------------------------------------------------------------------------------------------------------------------------------------------------------------------------------------------------------------------------------------------------------------------------|------------------------------------------------------------------------------------------------------------------------------------------------------------------------------------------------------------------------------------------------------------------------------------------------------------------------------------------------------------------------------------------------------------------------------------------------------------------------------------------------------------------------------------------------------------------------------------------------------------------------------------------------------------------------------------------------------------------------------------------------------------------------------------------------------------------------------------------------------------------------------------------------------------------------------------------------------------------------------------------------------------------------------------------------------------------------------|
| Specimen        | 4 pairs of GC and NM, and 2 NMs                                                                                                                                                                                 | 19 GCs and 6 NMs                                                                                                                                                                                                                                                                                                                                                                                                                                                                                                                                                                                                                                                                                                   | 22 pairs of GC and NM                                                                                                                                                                                                                                                                                                                                                                                                                                                                                                                                                                                                                                                                                                                                                                                                                                                                                                                                                                                                                                                        |
| Experiment type | Small RNA-seq<br>(Illumina HiSeq 2000)                                                                                                                                                                          | Small RNA-seq<br>(AB SOLiD System 3.0)                                                                                                                                                                                                                                                                                                                                                                                                                                                                                                                                                                                                                                                                             | miRNA microarray                                                                                                                                                                                                                                                                                                                                                                                                                                                                                                                                                                                                                                                                                                                                                                                                                                                                                                                                                                                                                                                             |
|                 | <b>hsa-miR-29c</b><br>hsa-miR-146b<br><b>hsa-miR-135b</b><br><b>hsa-miR-148a</b><br>hsa-miR-21<br>hsa-miR-221<br>hsa-miR-222<br>hsa-miR-223<br><b>hsa-miR-204</b><br>hsa-miR-33b<br>hsa-miR-431<br>hsa-miR-551a | hsa-let-7i<br>hsa-miR-192<br>hsa-miR-106a<br>hsa-miR-126<br>hsa-miR-155<br>hsa-miR-20a<br>hsa-miR-20b<br>hsa-miR-211<br>hsa-miR-140<br>hsa-miR-214<br>hsa-miR-215<br>hsa-miR-30d<br>hsa-miR-125a<br>hsa-miR-130a<br>hsa-miR-133b<br><b>hsa-miR-135b</b><br>hsa-miR-136<br>hsa-miR-145<br><b>hsa-miR-148a</b><br>hsa-miR-193a<br>hsa-miR-193b<br>hsa-miR-195<br><b>hsa-miR-204</b><br>hsa-miR-21<br><b>hsa-miR-29c</b><br>hsa-miR-335<br>hsa-miR-339<br>hsa-miR-340<br>hsa-miR-363<br>hsa-miR-423<br>hsa-miR-424<br>hsa-miR-484<br>hsa-miR-490<br>hsa-miR-491<br>hsa-miR-496<br>hsa-miR-518c<br>hsa-miR-548c<br>hsa-miR-551b<br>hsa-miR-559<br>hsa-miR-574<br>hsa-miR-592<br>hsa-miR-93<br>hsa-miR-95<br>hsa-miR-98 | ebv-miR-BART12<br>hsa-miR-100<br>ebv-miR-BART2<br>hsa-let-7b<br>hsa-miR-1<br>hsa-miR-101<br>hsa-miR-125b<br>hsa-miR-127<br>hsa-let-7c<br>hsa-miR-129<br>hsa-miR-133a<br>hsa-miR-139<br>hsa-miR-368<br>hsa-miR-375<br>hsa-miR-376a<br>hsa-miR-520d<br>hsa-miR-377<br>hsa-miR-378<br>hsa-miR-550<br>hsa-miR-379<br>hsa-miR-381<br>hsa-miR-422b<br>hsa-miR-552<br>hsa-miR-497<br>hsa-miR-603<br>hsa-miR-143<br>hsa-miR-146a<br>hsa-miR-149<br>hsa-miR-452*<br>hsa-miR-154<br>hsa-miR-18a<br>hsa-miR-18a*<br>hsa-miR-18b<br>hsa-miR-196a<br>hsa-miR-196b<br>hsa-miR-218<br>hsa-miR-26a<br>hsa-miR-492<br>hsa-miR-299-3p<br>hsa-miR-299-5p<br>hsa-miR-30c<br>hsa-miR-30e-3p<br>hsa-miR-30e-5p<br>hsa-miR-365<br>hsa-miR-125a<br>hsa-miR-130a<br>hsa-miR-133b<br><b>hsa-miR-135b</b><br>hsa-miR-136<br>hsa-miR-145<br><b>hsa-miR-148a</b><br>hsa-miR-193a<br>hsa-miR-193b<br>hsa-miR-195<br><b>hsa-miR-204</b><br><b>hsa-miR-29c</b><br>hsa-miR-363<br>hsa-miR-551b<br>hsa-miR-622<br>hsa-miR-633<br>hsa-miR-645<br>hsa-miR-655<br>hsa-miR-768-3p<br>hsa-miR-768-5p<br>hsa-miR-99a |

Bold represents overlapped miRNAs in all 3 miRNA profiles.

### Supplementary references

1. Oshima H, Oshima M, Inaba K, et al. Hyperplastic gastric tumors induced by activated macrophages in COX-2/mPGES-1 transgenic mice. *The EMBO journal* 2004;**23**:1669-78.
2. Oshima H, Matsunaga A, Fujimura T, et al. Carcinogenesis in mouse stomach by simultaneous activation of the Wnt signaling and prostaglandin E2 pathway. *Gastroenterology* 2006;**131**:1086-95.
